# Supplementary material
Source: publisher site journal article supplement (https://e-cmh.org/upload/media/cmh-2024-0038-Supplementary-Table-1.pdf)
Supplement: Supplementary file 1 [file cmh-2024-0038-Supplementary-Table-1.pdf]

**Supplementary Table 1.** Disease codes (ICD-9-CM/ICD-10) and prescription codes

| Diseases                       |              | ICD-9-CM/ICD-10                                                                                                                                                                                                                                                                                                                                                                                                                                                                                                                                                                                                                                                                                                                                                                                                                                                                                                                                                                                                                                                                                                                                                                                                                                                                                                                                                                                                                                                                                                                                                                                                                                                                                                                                                                                                                                                                                |
|--------------------------------|--------------|------------------------------------------------------------------------------------------------------------------------------------------------------------------------------------------------------------------------------------------------------------------------------------------------------------------------------------------------------------------------------------------------------------------------------------------------------------------------------------------------------------------------------------------------------------------------------------------------------------------------------------------------------------------------------------------------------------------------------------------------------------------------------------------------------------------------------------------------------------------------------------------------------------------------------------------------------------------------------------------------------------------------------------------------------------------------------------------------------------------------------------------------------------------------------------------------------------------------------------------------------------------------------------------------------------------------------------------------------------------------------------------------------------------------------------------------------------------------------------------------------------------------------------------------------------------------------------------------------------------------------------------------------------------------------------------------------------------------------------------------------------------------------------------------------------------------------------------------------------------------------------------------|
| Hepatocellular carcinoma (HCC) |              | 155.0, 155.2/C22.0, C22.8, C22.9                                                                                                                                                                                                                                                                                                                                                                                                                                                                                                                                                                                                                                                                                                                                                                                                                                                                                                                                                                                                                                                                                                                                                                                                                                                                                                                                                                                                                                                                                                                                                                                                                                                                                                                                                                                                                                                               |
| Liver transplant (LT)          |              | V427/Z94.4                                                                                                                                                                                                                                                                                                                                                                                                                                                                                                                                                                                                                                                                                                                                                                                                                                                                                                                                                                                                                                                                                                                                                                                                                                                                                                                                                                                                                                                                                                                                                                                                                                                                                                                                                                                                                                                                                     |
| Drugs                          |              | Reimbursement codes                                                                                                                                                                                                                                                                                                                                                                                                                                                                                                                                                                                                                                                                                                                                                                                                                                                                                                                                                                                                                                                                                                                                                                                                                                                                                                                                                                                                                                                                                                                                                                                                                                                                                                                                                                                                                                                                            |
| Metformin                      |              | A035324100, A0353241G0, A036201100, A036349100, A036848100, A0368481G0, A038498100, A0384981G0, A039546100, A042464100, A0424641G0, A0429161G0, A046686100, A046732100, A0470861G0, A047089100, A0488681G0, A050119100, AB34096100, AB340961G0, AB35665100, AB356651G0, AB38610100, AB386101G0, AB408351G0, AB41233100, AB412331G0, AB43706100, AB437061G0, AB47532100, AB475321G0, AB47991100, AB48130100, AB48229100, AB48484100, AB484841G0, AB49457100, AB494571G0, AB49599100, AB52485100, AB524851G0, AB55258100, AB552581G0, AB55298100, AB56661100, AB56756100, AB567561G0, AB57217100, AB572171G0, AB58071100, AB58280100, AB582801G0, AC36201100, AC362011G0, AC36204100, AC362041G0, AC363491G0, AC36820100, AC368201G0, AC38680100, AC386801G0, AC40047100, AC400471G0, AC40098100, AC40119100, AC40781100, AC407811G0, AC407811G4, AC407811G7, AC40835100, AC417501G0, AC42916100, AC44233100, AC46733100, AC47086100, AC47594100, AC47687100, AC481301G0, AC48734100, AC48863100, AC48868100, AC48910100, AC49531100, AC49659100, AC49957100, AC50080100, AC52534100, AC525341G0, AC552981G0, AC55985100, AC56652100, AC57171100, AC57172100, AC57177100, AC571771G0, AC57244100, AC57265100, AC57799100, AC57860100, AC57861100, AC57979100, AC58072100, AC58257100, AC58523100, AC58534100, AC585341G0, AC58564100, AC585641G0, AC58613100, AC586131G0, AC58954100, AC59009100, AC59300100, AC59393100, AC59654100, AC596541G0, AC59686100, AC596861G0, B016581100, BA24876100, BA25308100, BA253081G0, BC071521G0, BC165811G0, BC18231100, BC21729100, BC22662100, BC226621G0, BC22663100, BC23559100, BC23730100, BC24005100, BC24006100, BC24189100, BC24839100, BC25041100, BC25043100, BC25182100, BC25453100, BC25454100, BC25455100, BC25480100, BC25481100, BC25482100, BC25635100, BC25792100, BC25793100, BC25794100, BC26637100, BC26685100, BC26686100, BC271571G0 |
| Statin                         | Lovastatin   | A042389100, AC39307100, AC39403100, AC39601100, AC42539100, AC42558100, AC42627100, AC43573100, AC57216100, B025412100                                                                                                                                                                                                                                                                                                                                                                                                                                                                                                                                                                                                                                                                                                                                                                                                                                                                                                                                                                                                                                                                                                                                                                                                                                                                                                                                                                                                                                                                                                                                                                                                                                                                                                                                                                         |
|                                | Pravastatin  | A043887100, A046022100, AB46029100, AB48586100, AB48644100, AB48681100, AB49021100, AB49143100, AB49454100, AB49503100, AC47341100, AC48469100, AC48513100, AC48684100, AC51523100, AC52581100, AC57126100, AC57741100, B024297100, BC23596100, BC23597100, BC26169100                                                                                                                                                                                                                                                                                                                                                                                                                                                                                                                                                                                                                                                                                                                                                                                                                                                                                                                                                                                                                                                                                                                                                                                                                                                                                                                                                                                                                                                                                                                                                                                                                         |
|                                | Simvastatin  | A055967100, AB47348100, AC44998100, AC46402100, AC47775100, AC47907100, AC47924100, AC47928100, AC48608100, AC48813100, AC48926100, AC49190100, AC49360100, AC49535100, AC49661100, AC49672100, AC49699100, AC49792100, AC49841100, AC49997100, AC52465100, AC52479100, AC56804100, AC56806100, AC57176100, AC57806100, AC58207100, AC59251100, BC20037100, BC23506100, BC23970100, BC24250100, BC24339100, BC24868100, BC25211100                                                                                                                                                                                                                                                                                                                                                                                                                                                                                                                                                                                                                                                                                                                                                                                                                                                                                                                                                                                                                                                                                                                                                                                                                                                                                                                                                                                                                                                             |
|                                | Atorvastatin | AA48879100, AA49226100, AA49288100, AA49543100, AA52530100, AA56739100, AA57774100, AA57930100, AA57950100, AB51732100, AB54967100, AB57772100, AB57967100, AB58049100, AC50086100, AC51598100, AC52301100, AC55268100, AC55272100, AC55583100, AC55895100, AC55952100, AC55956100, AC56319100, AC56682100, AC56791100, AC57133100, AC57267100, AC57805100, AC58041100, AC58211100, AC58366100, AC58401100, AC58579100, BA25200100, BA25201100, BA25337100, BC22886100, BC22889100, BC22890100, BC24391100, BC24392100, BC26028100, BC26350100, BC26401100, BC26426100, BC26427100, BC26582100, BC26643100                                                                                                                                                                                                                                                                                                                                                                                                                                                                                                                                                                                                                                                                                                                                                                                                                                                                                                                                                                                                                                                                                                                                                                                                                                                                                     |
|                                | Fluvastatin  | AC56629100, BC21198100, BC21199100, BC23556100, BC26132100, BC26147100                                                                                                                                                                                                                                                                                                                                                                                                                                                                                                                                                                                                                                                                                                                                                                                                                                                                                                                                                                                                                                                                                                                                                                                                                                                                                                                                                                                                                                                                                                                                                                                                                                                                                                                                                                                                                         |
|                                | Pravastatin  | AA58648100, AC58078100, AC58525100, AC58526100, AC58633100, AC58639100, AC59192100, AC59193100, AC59398100, BC25350100, BC27002100,                                                                                                                                                                                                                                                                                                                                                                                                                                                                                                                                                                                                                                                                                                                                                                                                                                                                                                                                                                                                                                                                                                                                                                                                                                                                                                                                                                                                                                                                                                                                                                                                                                                                                                                                                            |

**Supplementary Table 1.** Continued

| Diseases     | ICD-9-CM/ICD-10                                                                                                                                                                                                                                                                                                                                                                                                                                                                                                                                                                                                                                                                                                                    |
|--------------|------------------------------------------------------------------------------------------------------------------------------------------------------------------------------------------------------------------------------------------------------------------------------------------------------------------------------------------------------------------------------------------------------------------------------------------------------------------------------------------------------------------------------------------------------------------------------------------------------------------------------------------------------------------------------------------------------------------------------------|
| Rosuvastatin | AA57802100, AA57843100, AA57880100, AA58282100, AB57194100, AB57940100, AC57130100, AC57803100, AC57809100, AC58067100, AC58098100, AC58270100, AC58291100, AC58315100, AC58316100, AC58384100, AC58396100, AC58411100, AC58605100, AC58621100, AC58622100, AC58813100, AC58822100, AC59240100, AC59265100, AC59266100, AC59649100, AC59652100, BA25797100, BA25798100, BA26332100, BA26504100, BC24129100, BC24131100, BC24597100, BC25796100, BC26226100, BC26367100, BC26368100, BC26497100, BC26505100, BC26543100, BC26544100, BC26857100, BC26900100, BC27044100                                                                                                                                                             |
| Aspirin      | A003092100, A004813100, A006485500, A021870100, A023534100, A024465100, A025160100, A025848100, A026164100, A029740100, A032045100, A036599100, A040658100, A040826100, A041018100, A0429341G0, A044016100, A0440161G0, A044069100, A044578100, A048339100, A0483391G0, A0485421G0, A054863100, AC29754100, AC37344100, AC373441G0, AC37702100, AC41220100, AC41511100, AC415111G0, AC41814100, AC418141G0, AC42461100, AC424611G0, AC42774100, AC42934100, AC43139100, AC43142100, AC43212100, AC43254100, AC43309100, AC433091G0, AC43663100, AC436631G0, AC43664100, AC436641G0, AC44176100, AC441761G0, AC48542100, AC495361G0, AC548631G0, AC54985100, AC549851G0, AC551041G0, BC23919100, BC24025100, BC240251G0, N011693100 |
